# Supplementary material for: Construction of highly hydrated and mechanically strong anti-fouling coatings for deep-sea probes based on poly(vinyl alcohol) tannic acid zwitterion coatings
Source: Royal Society of Chemistry journal article supplement (doi:10.1039/d4nj01258e), 2024-01-01
Supplement: d4nj01258e1.pdf [file d4nj01258e1.pdf]

## **Supplementary Material**

**Tannic acid reinforced polyvinyl alcohol zwitterion hydrogel  
antifouling coatings for deep sea probe surfaces: high  
hydration and mechanical strength**

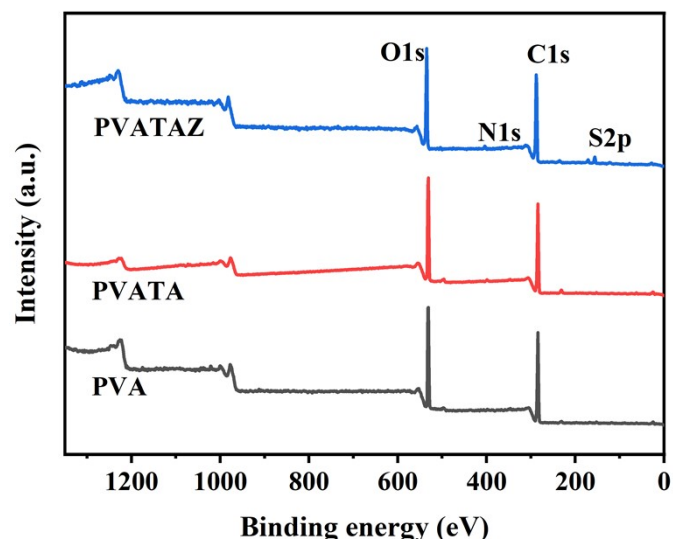

Fig S1. XPS survey spectra of PVA, PVATA and PVATAZ

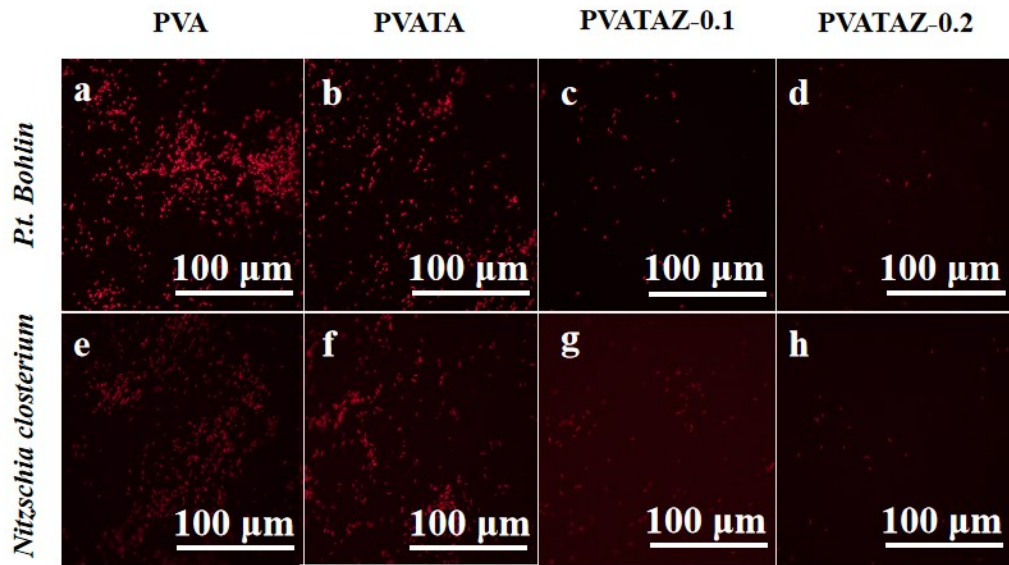

**Fig S2.** Fluorescence microscope images of PVA(a, e), PVATA(b, f), PVATAZ-0.1(c, g) and PVATAZ-0.2(d, h) hydrogels immersed in the solution of *Pt* and *Nc* for 14 days respectively

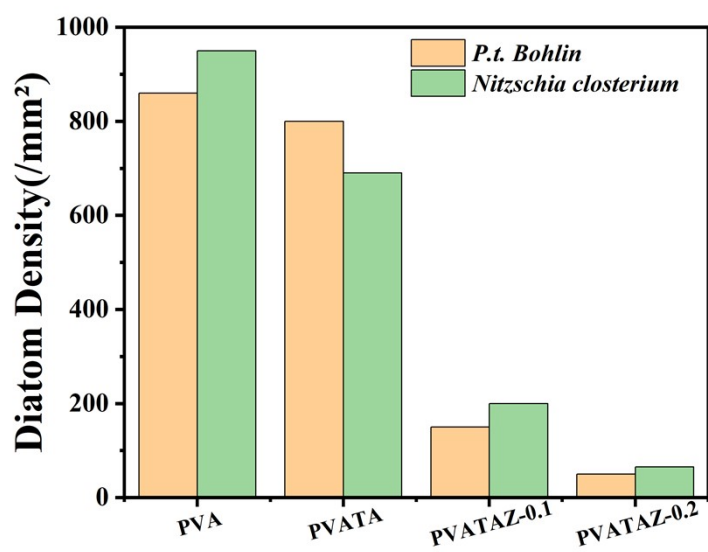

**Fig S3.** Diatom density of PVA, PVATA, PVATAZ-0.1 and PVATAZ-0.2

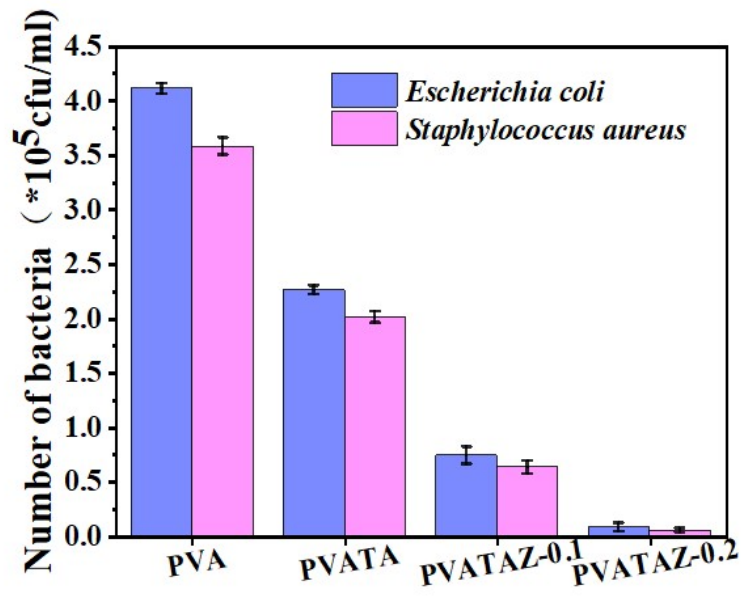

Fig S4. Number of bacteria images of PVA, PVATA, PVATAZ-0.1 and PVATAZ-0.2.

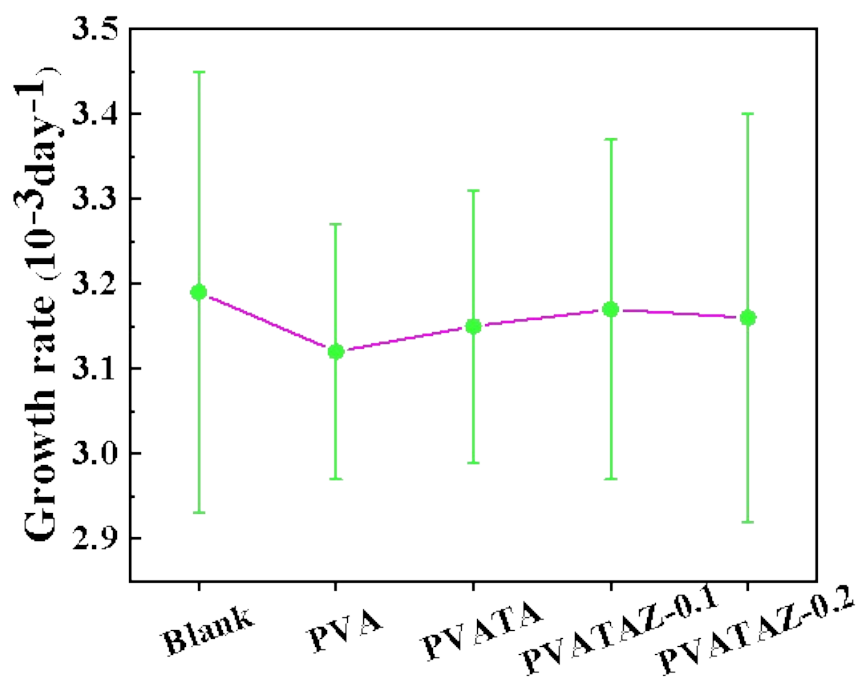

Fig S5. The algae's growth rate of PVA, PVATA, PVATAZ-0.1 and PVATAZ-0.2.

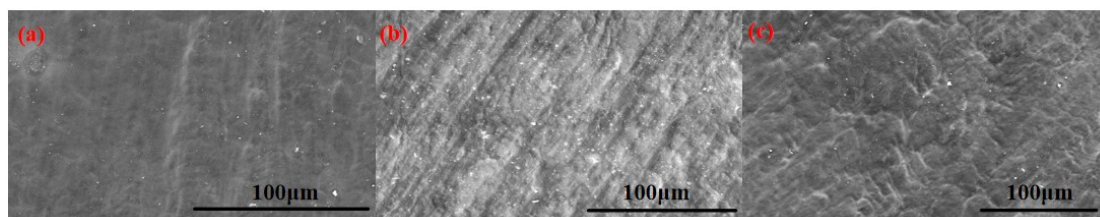

**Fig S6.** SEM image of PVATAZ (a)5wt% (b)10wt% (c)15wt%

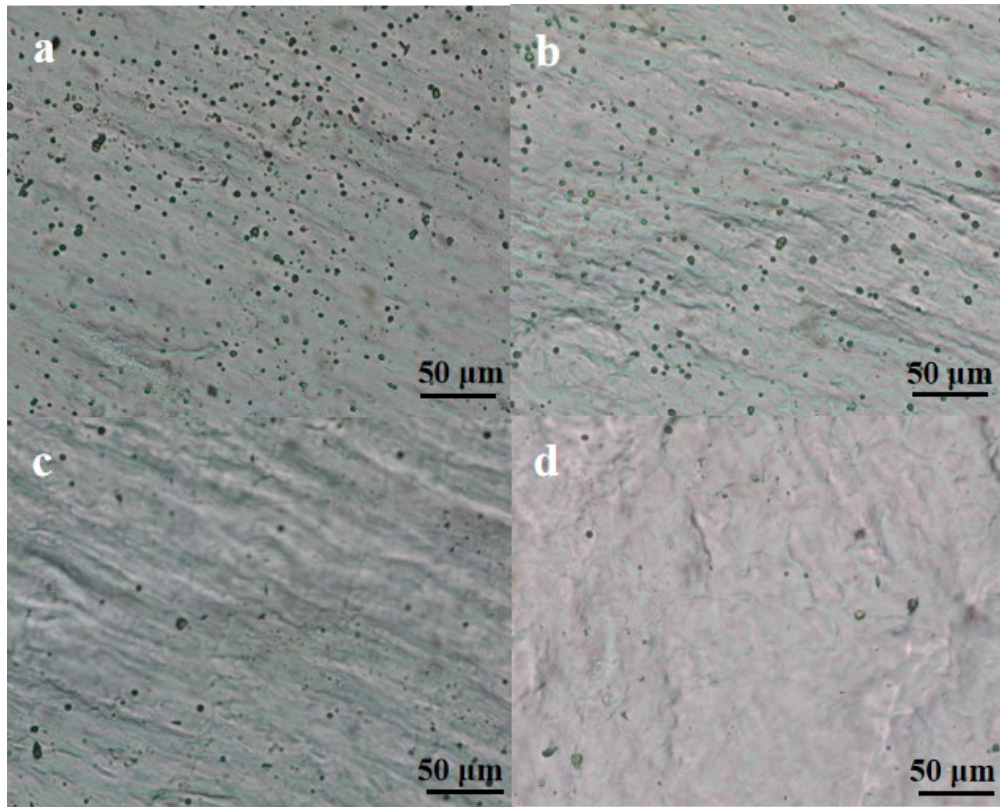

**Fig S7.** Diatom attachment diagrams of PVA, PVATA, PVATAZ-1, PVATAZ-2 after 12h immersion in *D.zhan-jiangensis* solution
